# Supplementary material for: Development and Validation of a General Clinical Model for Predicting Neoadjuvant Chemotherapy Efficacy in Locally Advanced Gastric Cancer: Evidence from Meta-Analysis and Real-World Study
Source: Research Square preprint supplement (doi:10.21203/rs.3.rs-6136117/v1), 2025-03-11
Supplement: Supplementary file 1 [file 1ca2f8becbe52d89d3691238.xlsx]

## Sheet: Table S2
Supplemental Table 2 Baseline Characteristics of 25 Cohorts Included in Systematic Review and Meta-Analysis
First Author/Year /Country(Continent)	Source of cohort	Study design and period	Sample size (% female)	Male/Female ratio	Age/Median Age/Mean Age	Efficacy assessment method	Effective chemotherapy	Factors related to efficacy of nct for GC
F Bataille[6]/2003	Institute of Pathology, University of Regensburg	1996.10-2000.12	25	14/11	33～62/47 /47.36	TRG (JCGC)	11	P53
Germany(Europe)		Retrospective Cohort Study	(44)
K Becker[7]/2011	Third Department of Medicine, Technical University of Munich	1997-2001	480	340/140	17～78/-/57.5	TRG (Becker)	223	Sex,Tumor location,Grade, Lauren classification
Germany(Europe)		Retrospective Cohort Study	(29.2)
L Jiang[8]/2021	Peking Union Medical College Hospital	2016.2-2019.12	203	155/48	26～81/63 /-	TRG (AJCC)	123	Age,Grade
China(Asia)		Retrospective Cohort Study	(23.6)
T Xie[9]/2021	Peking University Cancer Hospital	2013.3-2020.7	33	27/6	28～76/55 /55.73	TRG (Mandard Grade 3)	21	Clinical Stage, Clinical tumor stage,Clinical nodal stage
China(Asia)		Retrospective Cohort Study	(18.2)
W Xu[10]/2021	Ruijin Hospital, Shanghai Jiao Tong University School of Medicine Shanghai Institute of Digestive Surgery	2009.7-2018.12	267	199/68	21～80/63 /-	RECIST l.1	162	Sex,Age,Hemoglobin,CEA,Location,Tumor location,Signet ring cell, Borrmann classification,LNmax
China(Asia)		Retrospective Cohort Study	(25.5)
YL Tong[11]/2021	Department of Gastrointestinal Surgery, Liaoning Provincial Cancer Hospital	2010.1-2016.7	141	97/44	33～76/58/-	TRG (Mandard Grade 3)	75	CA724,Tumor size,Histological type,Lauren classification,Grade, Vascular or lymphatic invasion,Perineural invasion,Tumor location
China(Asia)		Retrospective Cohort Study	(31.2)
YH Chen[12]/2021	The Sixth Affiliated Hospital of Sun Yat-sen University	2013.2-2018.12	140	107/33	-/60 /-	TRG (Mandard Grade 3)	122	Age
China(Asia)		Retrospective Cohort Study	(23.6)
GT Lin[13]/2021	Union Hospital, Fujian Medical University	2019.1-2021.4	81	63/18	57～67/62 /-	TRG (Becker)	51	Age
China(Asia)		Retrospective Cohort Study	(22.2)
JY Zhang[14]/2022	Shanxi Cancer Hospital Yunnan Cancer Hospital The Sixth Affiliated Hospital of Sun Yat - sen University	2016.1-2020.11	633	496/137	23～89/-/-	TRG (AJCC)	364	Clinical tumor stage,Clinical nodal stage,Tumor location,Grade
China(Asia)		Retrospective Cohort Study	(27.6)
J Li[15]/2022	Zhengzhou University (Henan Cancer Hospital)	2017.1-2021.9	141	111/30	-	TRG (AJCC)	52	Tumor location
China(Asia)		Retrospective Cohort Study	(21.3)
WZ Kang[16]/2022	National Cancer Institute (NCI)	2011.4-2017.10	393	296/97	-	TRG (Mandard Grade 5)	225	-
USA(North America)		Retrospective Cohort Study	(24.7)
XH Tang[17]/2022	Peking University Cancer Hospital Gastrointestinal Oncology Center	-	33	25/8	-/59/-	TRG (NCCN)	15	Clinical stage, Clinical nodal stage,FAscore
China(Asia)		Retrospective Cohort Study	(24.2)
XW Liang[18]/2023	First Affiliated Hospital of South China University Central South University Xiangya Medical College Haikou Hospital	2014.1-2020.12	307	207/100	24～77/-/59.21±10.16	RECIST l.1	162	Tumor location,Tumor size,Grade,Clinical tumor stage, Clinical nodal stage,Borrmann classification,Smoking history
China(Asia)		Retrospective Cohort Study	(32.6)
YQ Song[19]/2009	Qingdao Municipal Hospital	2006.8-2007.10	35	21/14	31～67/61 /-	RECIST l.1	16	Drug resistance detection:Ts
China(Asia)		Prospective Cohort Study	(40)
JJ Qu[20]/2013	Department of Oncology, Weifang People's Hospital	2009.8-2011.8	53	40/13	33～69/59 /-	RECIST l.1	28	HER-2,P53
China(Asia)		Retrospective Cohort Study	(24.5)
HB Ye[21]/2014	Wenzhou Medical University Second Affiliated Hospital	2007.10-2013.10	86	73/13	28～89/65 /-	RECIST l.1	55	-
China(Asia)		Retrospective Cohort Study	(15.1)
HB Cui[22]/2014	Colorectal and Anal Surgery	2009.8-2012.8	104	45/59	39～71/- /54	RECIST l.1	57	HER-2,P53
China(Asia)		Retrospective Cohort Study	(56.7)
X Xu[23]/2019	Department of Gastrointestinal Surgery, Liaoning Provincial Cancer Hospital	2013.1-2014.1	120	89/31	28～70/58 /-	TRG (Mandard Grade 5)	80	Tumor size,Histological type,Grade,Vascular or Perineural invasion, Lauren classification,Borrmann classification
China(Asia)		Retrospective Cohort Study	(25.8)
YJ Zhu[24]/2019	Chinese Academy of Medical Sciences Peking Union Medical College Affiliated Cancer Hospital	2016.1-2018.6	65	56/9	33～71/59 /56.85±9.52	TRG (Mandard Grade 5)	37	DCE-MRI Ktrans,Ve
China(Asia)		Retrospective Cohort Study	(13.8)
J Wang[25]/2020	Department of Oncology, Inner Mongolian People's Hospital	2016.1-2018.5	90	47/43	38～75/- /56.3±10.6	RECIST l.1	64	Clinical Stage, Clinical nodal stage,Grade,miR-150
China(Asia)		Prospective Cohort Study	(47.8)
YZ.Wu[26]/2021	The First Affiliated Hospital, Sun Yat-sen University Department of Gastrointestinal Surgery	2017.11-2020.11	144	84/60	-/-/54.23±11.71	RECIST l.1	52	WBC
China(Asia)		Retrospective Cohort Study	(41.7)			TRG (AJCC)	44
T Du[27]/2021	TongJi University Department of Gastrointestinal Surgery, East Hospital Affiliated to Tongji University	2018.1-2020.12	63	34/29	-/- /60.67±8.33	TRG (NCCN)	44	Grade,Clinical stage,WT1-AS
China(Asia)		Retrospective Cohort Study	(46.0)
QW Li[28]/2022	Kunming Medical University Third Affiliated Hospital Yunnan Cancer Hospital	2013.6-2020.11	184	146/38	-/-/56.49±9.79	TRG (Becker)	64	Borrmann classification,Tumor location
China(Asia)		Retrospective Cohort Study	(20.7)
JM Qin[29]/2022	Department of Gastroenterology, Mianyang No.404 Hospital	2018.1-2020.2	100	55/45	20～67/- /48.8±9.11	RECIST l.1	39	CT tumor density reduction rate,CT tumor volume reduction rate
China(Asia)		Retrospective Cohort Study	(45)
ZC Chen[30]/2022	First Medical University of China, First Hospital	2014.6-2019.9	93	58/35	27～77/- /56.54±9.9	RECIST l.1	48	-
China(Asia)		Retrospective Cohort Study	(37.6)
Note: P53,tumour protein 53; CEA,carcinoembryonic antigen; CA199,carbohydrate antigen 199; NCT,neoadjuvant chemoradiotherapy; SOX,S-1 and oxaliplatin; XELOX, capecitabine and oxaliplatin regimen; FOLFOX,folinic acid,5-fluorouracil and oxaliplatin; EGFR,epidermal growth factor receptor; Her-2,human epidermal growth factor receptor 2; TOPO II,Topoisomerase II; FAscore;Focal Adhesion-related gene mo…
