# Supplementary material for: Development and Validation of a General Clinical Model for Predicting Neoadjuvant Chemotherapy Efficacy in Locally Advanced Gastric Cancer: Evidence from Meta-Analysis and Real-World Study
Source: Research Square preprint supplement (doi:10.21203/rs.3.rs-6136117/v1), 2025-03-11
Supplement: Supplementary file 2 [file 23b2a035932453925c0a498f.docx]

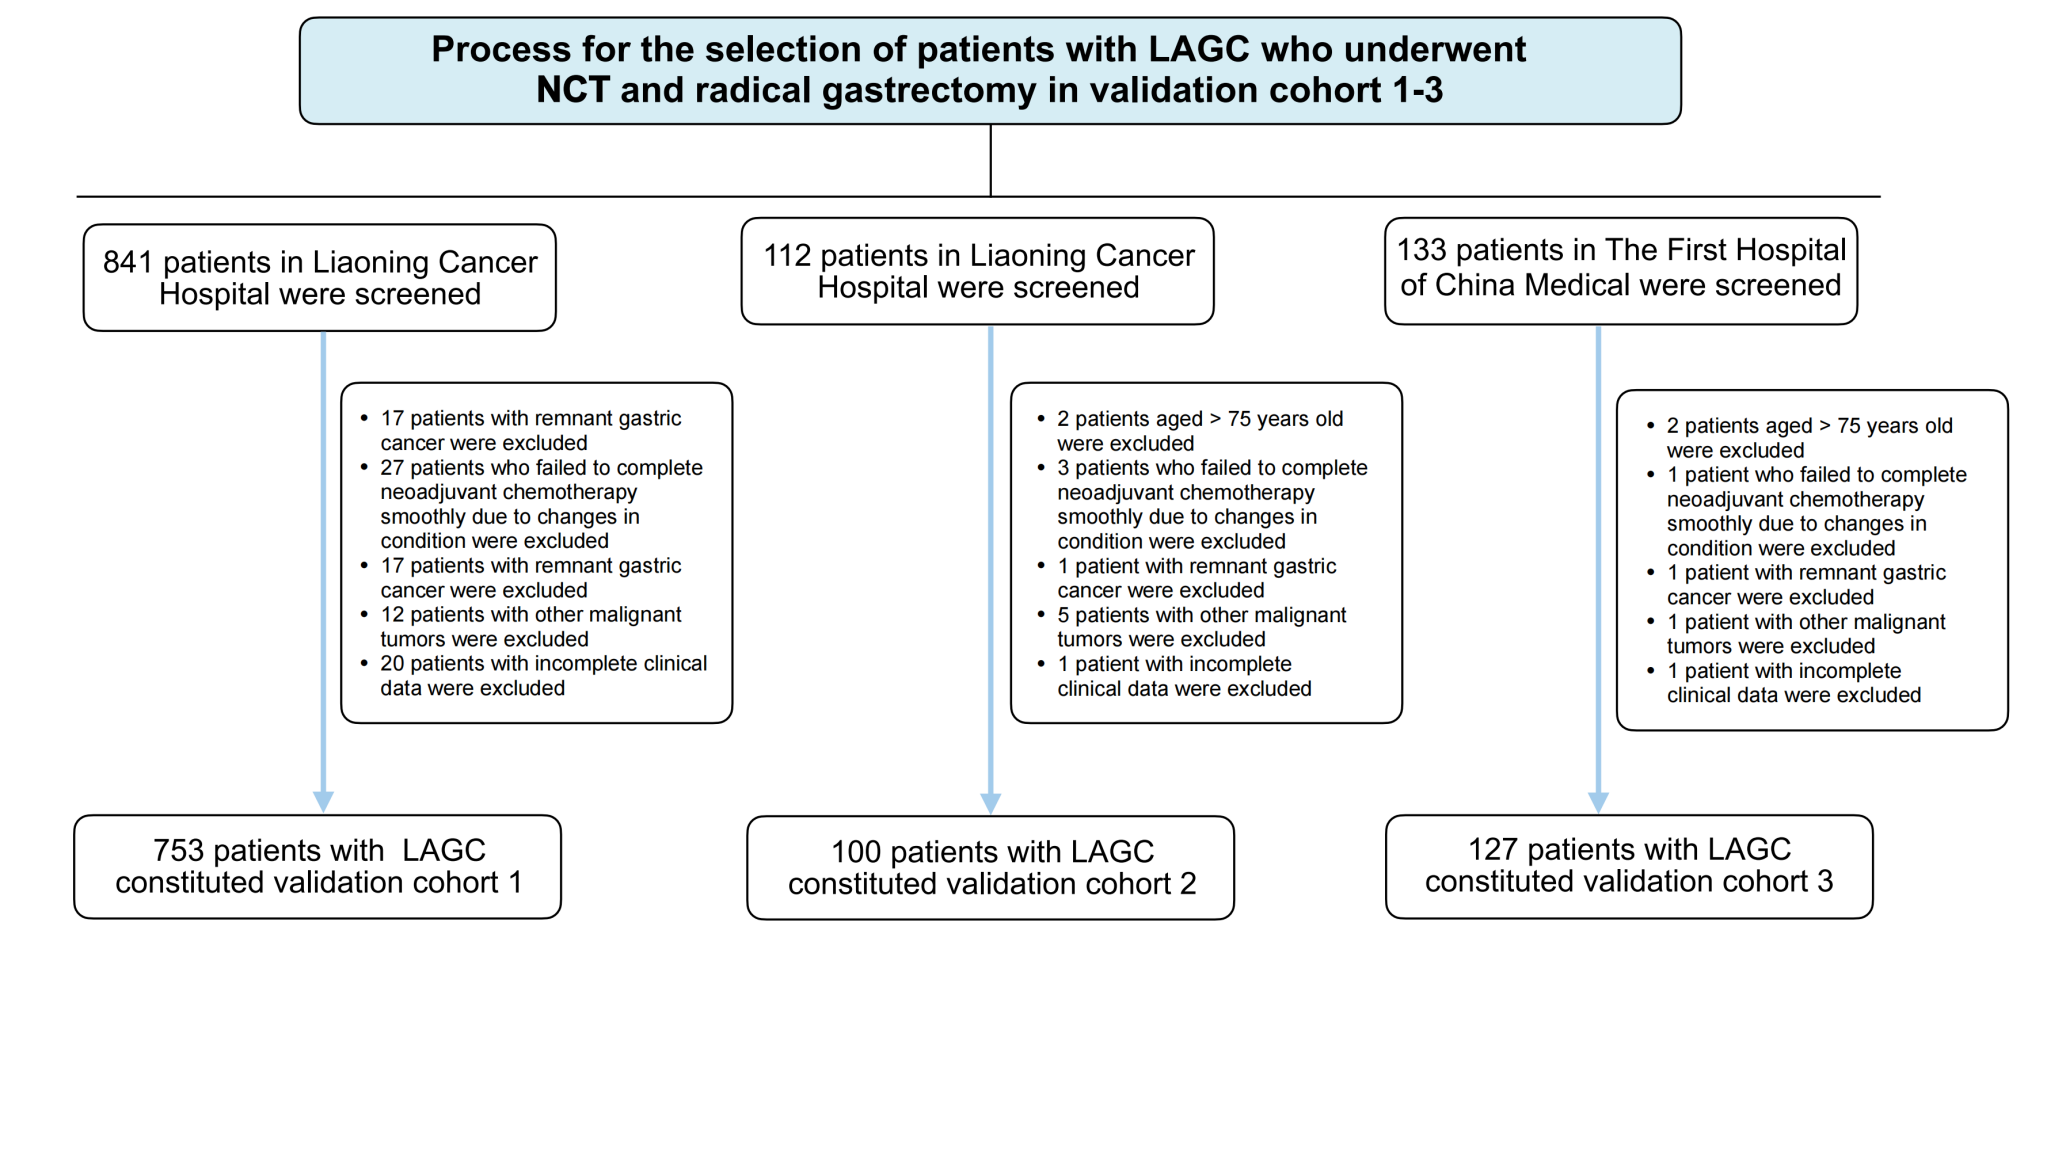


**Supplemental figure 1 Process for the selection of patients in validation**

**cohort 1-3**


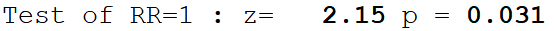


**Supplemental Figure 2 The correlation between CEA and the**

**NCT efficacy for LAGC (Pooled analysis)**


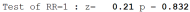

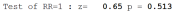

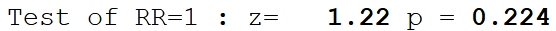

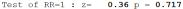

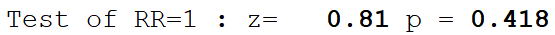

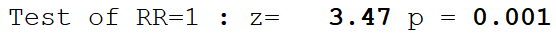

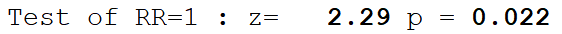

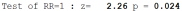

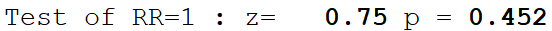

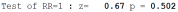


D

E

F

G

H

I

J

K

C

B

A


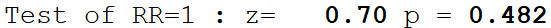


**Supplemental Figure 3 The correlation between tumor location and the NCT efficacy for LAGC**

1. Upper (Pooled analysis); B. Upper (TRG subgroup); C. Upper (RECIST subgroup); D. Middle (Pooled analysis); E. Middle (TRG subgroup); F. Middle (RECIST subgroup); G. Lower (Pooled analysis); H. Lower(TRG subgroup); I.Lower(RECIST subgroup); J. Whole (Pooled analysis); K. Whole (TRG subgroup)


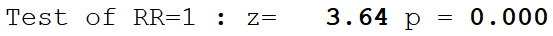

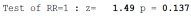

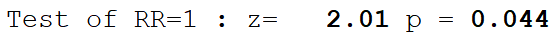


A

B

C

**Supplemental Figure 4 The correlation between Lauren classification and the NCT efficacy for LAGC**

1. **Intestinal-type** (Pooled analysis); B. Mixed-type (Pooled analysis); C. Diffuse-type (Pooled analysis)


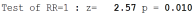

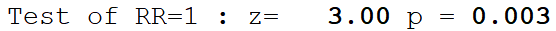

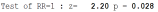

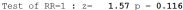

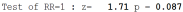

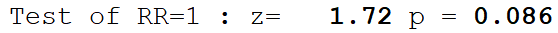

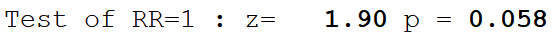

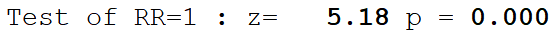

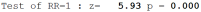

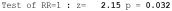


C

B

A

D

E

F

G

H

I

J

**Supplemental Figure 5 The correlation between tumor grade and**

**the NCT efficacy for LAGC**

A. Well＆Moderately-differentiated (Pooled analysis); B. Well＆Moderately-differentiated (TRG subgroup); C. Well＆Moderately-differentiated (RECIST subgroup); D. Well-differentiated (Pooled analysis); E. Moderately-differentiated (Pooled analysis); F. Moderately-differentiated (TRG subgroup); G. Poorly-differentiated (Pooled analysis); H. Poorly-differentiated (TRG subgroup); I. Undifferentiated (Pooled analysis); J. Undifferentiated (TRG subgroup)


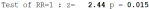

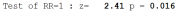

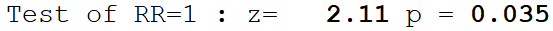

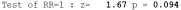


B

A

C

D

**Supplemental Figure 6 The correlation between clinical tumor stage and**

**the NCT efficacy for LAGC**

A. T2 (Pooled analysis); B. T3 (Pooled analysis); C. T4 (Pooled analysis); D. T4 (TRG subgroup).

B

A


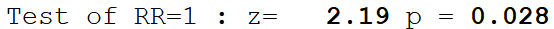

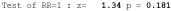

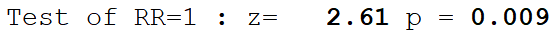

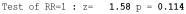

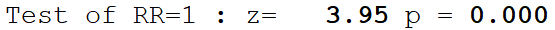


C

D

E

B

A

**Supplemental Figure 7 The correlation between clinical nodal stage and**

**the NCT efficacy for LAGC**

A. N0 (Pooled analysis); B. N0 (TRG subgroup); C. N1 (Pooled analysis); D. N2 (Pooled analysis); E. N3 (Pooled analysis).


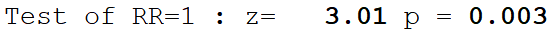

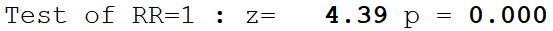

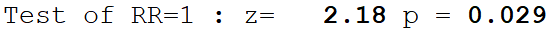


B

A

C

**Supplemental Figure 8 The correlation between clinical stage and**

**the NCT efficacy for LAGC**

A. Clinical stage I+II (Pooled analysis); B. Clinical stage II (Pooled analysis); C. Clinical stage III (Pooled analysis).


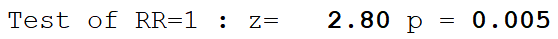


**Supplemental Figure 9 The correlation between HER-2 and**

**the NCT efficacyfor LAGC (Pooled analysis)**


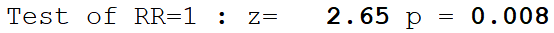


**Supplemental Figure 10 The correlation between Ki67 and**

**the NCT efficacy for LAGC (Pooled analysis)**

A

B

C

D

*P*=0.040

*P*=0.394

*P*=0.147

*P*=0.682

A

B

C

D

**Supplemental Figure 11 Publication Bias of tumor location**

A. Egger's test of Upper (Pooled analysis); B. Egger's test of Middle (Pooled analysis); C. Egger's test of Lower (Pooled analysis); D. Egger's test of Lower ( TRG subgroup); E. Funnel plot of Upper (Pooled analysis); F. Funnel plot of Middle (Pooled analysis); G. Funnel plot of Lower (Pooled analysis); H. Funnel plot of Lower ( TRG subgroup).

A

B

*P*=0.660

*P*=0.818

A

B

**Supplemental Figure 12 Publication Bias of grade**

A. Egger's test of Well＆Moderately-differentiated (Pooled analysis); B. Egger's test of Well＆Moderately-differentiated (TRG subgroup); C. Funnel plot of Well＆Moderately-differentiated (Pooled analysis); D. Funnel plot of Well＆Moderately-differentiated (TRG subgroup).

A

B

C

D

E

F

G

**Supplemental Figure 13 Sensitivity Analysis of tumor location**

A. Upper (Pooled analysis); B. Upper (TRG subgroup); C. Middle (TRG subgroup); D. Lower (Pooled analysis); E. Lower (TRG subgroup); F. Whole (Pooled analysis); F. Whole (TRG subgroup).

A

B

C

**Supplemental Figure 14 Sensitivity Analysis of Lauren classification**

A. Mixed-type (Pooled analysis); B. **Intestinal-type** (Pooled analysis); C. Mixed-type (Pooled analysis).

A

B

C

E

F

**Supplemental Figure 15 Sensitivity Analysis of tumor grade**

A. Moderately-differentiated (Pooled analysis); B. Poorly-differentiated (Pooled analysis); C. Poorly-differentiated (TRG subgroup); D. Well＆Moderately-differentiated (Pooled analysis); E. Well＆Moderately-differentiated (TRG subgroup).

A

B

C

D

**Supplemental Figure 16 Sensitivity Analysis of clinical tumor stage**

A. T2 and T3 (Pooled analysis); B. T3 (Pooled analysis); C. T4 (Pooled analysis); D.T4 (TRG subgroup).

A

B

**Supplemental Figure 17 Sensitivity Analysis of clinical nodal stage**

A. N0 (Pooled analysis); B. N0 (TRG subgroup).
