# Supplementary material for: Development and Validation of a General Clinical Model for Predicting Neoadjuvant Chemotherapy Efficacy in Locally Advanced Gastric Cancer: Evidence from Meta-Analysis and Real-World Study
Source: Research Square preprint supplement (doi:10.21203/rs.3.rs-6136117/v1), 2025-03-11
Supplement: Supplementary file 3 [file 37809ec3f9588189cca13ea2.xlsx]

## Sheet: Table S7
Supplemental Table 7 Clinical Features Related to NCT Efficacy of LAGC Based On 25 Studies
Related factors	Number of studies included	Efficacy assessment method	RR/SMD(95%CI)	I²	P value
Sex Male[6,7,8,9,10,11,13,15,16,17,18,23,24,25,26,27,28,29,30]	19	Pooled analysis	1.02(0.98-1.07)	13.1	0.339
Sex Male[6,7,8,9,11,13,15,16,27,23,24,26,27,28]	14	TRG subgroup	1.01(0.96-1.07)	1.8	0.634
Sex Male[10,18,25,26,29,30]	6	RECIST subgroup	1.06(0.96-1.16)	25.7	0.256
Age ≤60[7,8,9,12,23]	5	Pooled analysis	0.85(0.71-1.02)	36.9	0.074
Age ≤55[6,25]	2	Pooled analysis	0.82(0.59-1.15)	0	0.25
Smoker Non-smoker[8,18]	2	Pooled analysis	1.26(0.85-1.87)	81.7	0.255
CEA Negative[14,15,27,28]	4	Pooled analysis	1.10(1.01-1.21)	0	0.031
CA199 Negative[11,14,15]	3	Pooled analysis	0.92(0.73-1.16)	73.7	0.482
Location Upper[6,7,8,10,11,14,15,24,26,28,29]	11	Pooled analysis	0.94(0.67-1.32)	86.8	0.717
Location Upper[6,7,8,11,14,15,24,26,28]	9	TRG subgroup	0.86(0.60-1.24)	88.3	0.418
Location Upper[10,26,29]	3	RECIST subgroup	1.77(1.28-2.45)	0	0.001
Location Lower[6,7,8,10,11,15,24,26,28,29]	10	Pooled analysis	0.87(0.77-0.98)	20.4	0.022
Location Lower[10,26,29]	3	RECIST subgroup	0.91(0.71-1.17)	0	0.452
Location Middle[6,8,10,11,14,15,24,26,28,29]	10	Pooled analysis	0.98(0.85-1.14)	46.7	0.832
Location Middle[6,8,11,14,15,24,26,28]	8	TRG subgroup	1.10(0.82-1.49)	58.2	0.513
Location Middle[10,26,29]	3	RECIST subgroup	0.91(0.71-1.18)	0	0.482
Location Whole[7,8,10,11,14,15,24]	7	Pooled analysis	0.60(0.26-1.37)	66.3	0.224
Location Whole[7,8,11,14,15,24]	6	TRG subgroup	0.67(0.21-2.15)	71.4	0.502
Borrmann classification I+II[10,15,18,23,28]	5	Pooled analysis	1.18(0.80-1.74)	76.3	0.408
Borrmann classification I+II[10,18,23]	3	TRG subgroup	1.01(0.69-1.49)	72.8	0.943
Borrmann classification I+II[10,18]	2	RECIST subgroup	3.41(0.30-38.56)	83	0.322
Lauren classification Intestinal-type[6,7,9,11,13,23,24]	7	Pooled analysis	1.28(1.12-1.46)	0	＜0.001
Lauren classification Mixed-type[6,7,9,11,24]	5	Pooled analysis	0.86(0.70-1.05)	0	0.137
Lauren classification Diffuse-type[6,7,9,11,24]	5	Pooled analysis	1.16(1.00-1.34)	0	0.044
Grade well＆moderately-differentiated[7,8,9,10,11,14,18,23,24,25,26,27,28,30]	14	Pooled analysis	1.63(1.35-1.95)	54.8	＜0.001
Grade well＆moderately-differentiated[7,8,9,11,14,23,24,26,27,28]	10	TRG subgroup	1.54(1.33-1.77)	38.7	＜0.001
Grade well＆moderately-differentiated[10,18,25,30]	4	RECIST subgroup	1.65(1.04-2.62)	79.9	0.032
Grade well-differentiated[14,24,28]	3	Pooled analysis	1.70(1.14-2.56)	0	0.01
Grade moderately-differentiated[14,24,28,30]	4	Pooled analysis	1.41(1.13-1.77)	47.6	0.003
Grade moderately-differentiated[14,24,28]	3	TRG subgroup	1.64(1.05-2.54)	55.1	0.028
Grade poorly-differentiated[9,14,24,26,28,30]	6	Pooled analysis	0.81(0.63-1.05)	76.2	0.116
Grade poorly-differentiated[9,14,24,26,28]	5	TRG subgroup	0.76(0.56-1.04)	80.9	0.087
Grade undifferentiated[9,10,30]	3	Pooled analysis	1.23(0.97-1.54)	0	0.086
Grade undifferentiated[10,30]	2	TRG subgroup	1.25(0.99-1.58)	0	0.058
Clinical Tumor Stage T2[8,9,14,15]	4	Pooled analysis	1.90(1.31-3.17)	0	0.015
Clinical Tumor Stage T3[8,9,11,14,15,17,18,28]	8	Pooled analysis	1.52(1.08-2.14)	81	0.016
Clinical Tumor Stage T4[8,9,11,14,15,17,18,28]	8	Pooled analysis	0.78(0.62-0.98)	89.3	0.035
Clinical Tumor Stage T4[8,9,11,14,15,17,28]	7	TRG subgroup	0.82(0.65-1.03)	84.1	0.094
Clinical Nodal Stage N-[8,9,11,14,15,17,18,25,27,28]	10	Pooled analysis	1.75(1.06-2.89)	82.6	0.028
Clinical Nodal Stage N-[8,9,11,14,15,17,27,28]	8	TRG subgroup	1.40(0.86-2.29)	76.8	0.181
Clinical Nodal Stage N1[9,14,28]	3	Pooled analysis	1.35(1.08-1.69)	0	0.009
Clinical Nodal Stage N2[9,14,28]	3	Pooled analysis	0.86(0.71-1.04)	0	0.114
Clinical Nodal Stage N3[9,14,28]	3	Pooled analysis	0.62(0.49-0.78)	0	＜0.001
Clinical Stage I+II[25,29]	2	Pooled analysis	1.42(1.04-1.94)	12.3	0.029
Clinical Stage II[9,17,27]	3	Pooled analysis	3.27(1.51-7.09)	0	0.003
Clinical Stage III[9,17,28]	3	Pooled analysis	0.55(0.43-0.72)	20.8	＜0.001
NCT Regimen SOX[9,11]	2	Pooled analysis	1.18(0.99-1.41)	0	0.062
NCT Regimen XELOX[9,11]	2	Pooled analysis	1.84(0.54-6.30)	0	0.33
NCT Regimen FOLFOX[11,21]	2	Pooled analysis	0.59(0.25-1.36)	70.9	0.215
NCT Cycles 2 Cycles[9,11,12]	3	Pooled analysis	0.93(0.74-1.16)	0	0.519
NCT Cycles 3 Cycles[9,11,12]	3	Pooled analysis	1.01(0.74-1.39)	0	0.946
NCT Cycles 4 Cycles[9,11]	2	Pooled analysis	1.08(0.84-1.39)	0	0.559
HER-2 Positive[20,22]	2	Pooled analysis	4.16(1.53-11.29)	0	0.005
EGFR Positive[20,22]	2	Pooled analysis	1.09(0.82-1.45)	0	0.54
Ki67 ≥10%[20,22]	2	Pooled analysis	0.79(0.67-0.94)	0	0.008
P53 ≥10%[6,20,22]	3	Pooled analysis	0.74(0.31-1.81)	87	0.515
TOPO Positive[19,20]	2	Pooled analysis	1.06(0.69-1.61)	0	0.8
Nervous Invasion N+[11,24]	2	Pooled analysis	0.8(0.56-1.13)	0	0.202
Note: NCT,neoadjuvant chemotherapy; LAGC,locally advanced gastric cancer; TRG,tumor regression grade; RECIST,response evaluation criteria in solid tumors; RR,risk ratio; SMD,standardized mean difference; CI,confidence interval;I²,heterogeneity index; CEA,carcinoembryonic antigen; CA199,carbohydrate antigen 199;HER-2,human epidermal growth factor receptor 2; EGFR,epidermal growth factor receptor;K…
