# Supplementary material for: Development and Validation of a General Clinical Model for Predicting Neoadjuvant Chemotherapy Efficacy in Locally Advanced Gastric Cancer: Evidence from Meta-Analysis and Real-World Study
Source: Research Square preprint supplement (doi:10.21203/rs.3.rs-6136117/v1), 2025-03-11
Supplement: Supplementary file 4 [file 485285386111eddbaa6363a1.xlsx]

## Sheet: Table S3
Supplemental Table 3 Newcastle-Ottawa Quality Assessment Scale of 25 Cohort Studies
Study (First author/year)	Selection				Comparability	Outcomes			Total scores
	Representativeness of the exposed cohort	Selection of the non-exposed cohort	Ascertainment of exposure	Demonstration that outcome of interest was not present at start of study		Assessment of outcome	Was follow-up long enough for outcomes to occur	Adequacy of follow up of cohorts
F Bataille/2003[6]	★	★	★	★	★	★	★	★	8
K Becker/2011[7]	★	★	★	★	★★	★	★	★	9
L Jiang/2021[8]	★	★	★	★	★★	★	★	★	9
T Xie/2021[9]	★	★	★	★	★	★	★	★	8
W Xu/2021[10]	★	★	★	★	★★	★	★	★	9
YL Tong/2021[11]	★	★	★	★	★★	★	★	★	9
YH Chen/2021[12]	★	★	★	★	★★	★	★	★	9
GT Lin/2022[13]	★	★	★	★	★★	★	★	★	9
JY Zhang/2022[14]	★	★	★	★	★★	★	★	★	9
J Li/2022[15]	★	★	★	★	★★	★	★	★	9
WZ Kang/2022[16]	★	★	★	★	★★	★	★	★	9
XH Tang/2022[17]	★	★	★	★	★★	★	★	★	9
XW Liang/2023[18]	★	★	★	★	★★	★	★	★	9
YQ Song/2009[19]	★	★	★	★	★	★	★	★	8
JJ Qu/2013[20]	★	★	★	★	★★	★	★	★	9
HB Ye/2014[21]	★	★	★	★	★	★	★	★	8
HB Cui/2014[22]	★	★	★	★	★★	★	★	★	9
X Xu/2019[23]	★	★	★	★	★★	★	★	★	9
YJ Zhu/2019[24]	★	★	★	★	★★	★	★	★	9
J Wang/2020[25]	★	★	★	★	★★	★	★	★	9
YZ Wu/2021[26]	★	★	★	★	★	★	★	★	8
T Du/2021[27]	★	★	★	★	★★	★	★	★	9
WQ Li/2022[28]	★	★	★	★	★★	★	★	★	9
JM Qin/2022[29]	★	★	★	★	★★	★	★	★	9
ZC Chen/2022[30]	★	★	★	★	★★	★	★	★	9
