# Supplementary material for: Development and Validation of a General Clinical Model for Predicting Neoadjuvant Chemotherapy Efficacy in Locally Advanced Gastric Cancer: Evidence from Meta-Analysis and Real-World Study
Source: Research Square preprint supplement (doi:10.21203/rs.3.rs-6136117/v1), 2025-03-11
Supplement: Supplementary file 5 [file 85563a369c551a00598da686.xlsx]

## Sheet: Table S4
Supplemental Table 4 20 Clinical Features Included in the Systematic Review and Meta-Analysis
Clinical features	First author/ Year	Sample size	Efficacy evaluation criteria	Definition of feature	Number of people with effective NCT	RR	95%CI	P value
Sex	F Bataille/2003	25	TRG	Male	7	1.27	0.64-2.53	0.492
Sex	K Becker/2011	480	TRG	Male	168	1.13	1.00-1.26	0.042
Sex	L Jiang/2021	203	TRG	Male	94	1.00	0.86-1.17	0.977
Sex	T Xie/2021	33	TRG	Male	16	0.83	0.62-1.11	0.217
Sex	YL Tong/2021	141	TRG	Male	48	0.86	0.69-1.08	0.189
Sex	GT Lin/2022	81	TRG	Male	40	1.02	0.80-1.31	0.855
Sex	J Li/2022	141	TRG	Male	41	1.00	0.84-1.20	0.978
Sex	WZ Kang/2022	393	TRG	Male	164	0.93	0.83-1.04	0.19
Sex	XH Tang/2022	33	TRG	Male	13	1.30	0.89-1.91	0.179
Sex	X Xu/2019	120	TRG	Male	58	0.94	0.75-1.16	0.543
Sex	YJ Zhu/2019	65	TRG	Male	33	1.09	0.88-1.33	0.433
Sex	YZ Wu/2021	93	TRG	Male	28	1.04	0.76-1.42	0.81
Sex	T Du/2021	63	TRG	Male	23	0.90	0.56-1.45	0.674
Sex	QW Li/2022	184	TRG	Male	53	1.07	0.92-1.24	0.378
Sex	X Wu/2021	267	RECIST	Male	129	1.19	1.02-1.40	0.026
Sex	XW Liang/2023	307	RECIST	Male	109	1.03	0.88-1.20	0.744
Sex	J Wang/2020	90	RECIST	Male	30	0.72	0.49-1.05	0.088
Sex	YZ Wu/2021	144	RECIST	Male	32	1.09	0.82-1.44	0.551
Sex	JM Qin/2022	100	RECIST	Male	21	0.97	0.67-1.39	0.854
Sex	ZC Chen/2022	93	RECIST	Male	29	1.07	0.78-1.46	0.688
Age	F Bataille/2003	28	TRG	≤60	9	0.82	0.60-1.11	0.199
Age	L Jiang/2021	120	TRG	≤60	44	0.72	0.52-0.99	0.042
Age	T Xie/2021	20	TRG	≤60	13	0.93	0.55-1.57	0.781
Age	YH Chen/2021	24	TRG	≤60	10	2.00	0.95-4.21	0.068
Age	X Xu/2019	67	TRG	≤60	46	0.85	0.64-1.13	0.272
Age	F Bataille/2003	26	TRG	≤55	8	0.85	0.56.1.29	0.444
Age	J Wang/2020	40	RECIST	≤55	28	0.81	0.52-1.28	0.367
Smoke	L Jiang/2021	203	TRG	Non-smoker	59	1.01	0.75.1.36	0.948
Smoke	XW Liang/2023	307	RECIST	Non-smoker	168	1.51	1.28-1.79	<0.001
CEA	JY Zhang/2022	633	TRG	≤5μg/L	264	1.09	0.98-1.21	0.11
CEA	J Li/2022	141	TRG	≤5μg/L	30	0.97	0.73-1.29	0.83
CEA	T Du/2021	63	TRG	≤5μg/L	19	1.17	0.59-2.31	0.647
CEA	QW Li/2022	184	TRG	≤5μg/L	48	1.25	1.02-1.53	0.031
CA199	YL Tong/2021	141	TRG	≤20U/mL	64	1.06	0.91-1.24	0.433
CA199	JY Zhang/2022	633	TRG	≤20U/mL	118	0.78	0.63.0.96	0.017
CA199	J Li/2022	141	TRG	≤20U/mL	32	0.93	0.72-1.21	0.576
Tumor location	F Bataille/2003	25	TRG	Upper	2	2.55	0.26-24.56	0.419
Tumor location	K Becker/2011	480	TRG	Upper	143	1.41	1.19-1.66	<0.001
Tumor location	L Jiang/2021	203	TRG	Upper	34	1.70	0.96-3.02	0.07
Tumor location	YL Tong/2021	141	TRG	Upper	11	0.16	0.09-0.27	<0.001
Tumor location	JY Zhang/2022	633	TRG	Upper	133	1.07	0.86-1.32	0.545
Tumor location	J Li/2022	141	TRG	Upper	28	0.87	0.65-1.18	0.368
Tumor location	YJ Zhu/2019	65	TRG	Upper	16	1.01	0.57-1.78	0.975
Tumor location	YZ Wu/2021	93	TRG	Upper	14	0.87	0.49-1.53	0.62
Tumor location	QW Li/2022	184	TRG	Upper	21	0.67	0.45-0.99	0.045
Tumor location	X Wu/2021	267	RECIST	Upper	59	2.01	1.28-3.17	0.003
Tumor location	YZ Wu/2021	144	RECIST	Upper	22	1.56	0.98-2.47	0.06
Tumor location	JM Qin/2022	100	RECIST	Upper	1	0.78	0.07-8.34	0.839
Tumor location	F Bataille/2003	25	TRG	Middle	5	1.27	0.49-3.31	0.621
Tumor location	L Jiang/2021	203	TRG	Middle	40	1.04	0.69-1.57	0.85
Tumor location	YL Tong/2021	141	TRG	Middle	18	2.64	1.11-6.26	0.027
Tumor location	JY Zhang/2022	633	TRG	Middle	86	0.72	0.56-0.93	0.011
Tumor location	J Li/2022	141	TRG	Middle	18	1.71	0.98-2.99	0.058
Tumor location	YJ Zhu/2019	65	TRG	Middle	8	0.76	0.32-1.77	0.52
Tumor location	YZ Wu/2021	93	TRG	Middle	13	0.85	0.47-1.55	0.598
Tumor location	QW Li/2022	184	TRG	Middle	20	1.29	0.80-2.09	0.296
Tumor location	X Wu/2021	267	RECIST	Middle	42	1.05	0.69-1.60	0.831
Tumor location	JM Qin/2022	100	RECIST	Middle	19	0.96	0.64-1.44	0.838
Tumor location	YZ Wu/2021	144	RECIST	Middle	16	0.73	0.45-1.16	0.73
Tumor location	F Bataille/2003	25	TRG	Lower	6	1.27	0.57-2.86	0.56
Tumor location	K Becker/2011	480	TRG	Lower	79	0.76	0.61-0.95	0.014
Tumor location	L Jiang/2021	203	TRG	Lower	48	0.76	0.56-1.04	0.082
Tumor location	YL Tong/2021	141	TRG	Lower	38	0.78	0.59-1.03	0.083
Tumor location	JY Zhang/2022	633	TRG	Lower	139	1.43	1.13-1.81	0.003
Tumor location	J Li/2022	141	TRG	Lower	5	0.61	0.23-1.60	0.316
Tumor location	YJ Zhu/2019	65	TRG	Lower	10	1.08	0.47.2.48	0.854
Tumor location	YZ Wu/2021	93	TRG	Lower	17	1.35	0.76-2.41	0.307
Tumor location	QW Li/2022	184	TRG	Lower	23	1.35	0.87-2.10	0.185
Tumor location	X Wu/2021	267	RECIST	Lower	44	0.84	0.58-1.22	0.357
Tumor location	JM Qin/2022	100	RECIST	Lower	19	1.06	0.70-1.62	0.782
Tumor location	YZ Wu/2021	144	RECIST	Lower	14	0.88	0.51-1.52	0.659
Tumor location	K Becker/2011	480	TRG	Whole	1	0.06	0.01-0.43	0.005
Tumor location	L Jiang/2021	203	TRG	Whole	1	0.65	0.04-10.25	0.76
Tumor location	YL Tong/2021	141	TRG	Whole	8	1.01	0.39-2.62	0.991
Tumor location	JY Zhang/2022	633	TRG	Whole	6	0.26	0.10-0.65	0.004
Tumor location	J Li/2022	141	TRG	Whole	5	4.28	0.86-21.27	0.076
Tumor location	YJ Zhu/2019	65	TRG	Whole	3	2.27	0.25-20.68	0.467
Borrmann classification	J Li/2022	141	TRG	I+II	32	1.22	0.90-1.64	0.195
Borrmann classification	X Xu/2019	120	TRG	I+II	33	1.27	0.76-2.13	0.367
Borrmann classification	QW Li/2022	184	TRG	I+II	32	0.73	0.56-0.96	0.025
Borrmann classification	X Wu/2021	267	RECIST	I+II	20	12.96	1.77-95.14	0.012
Borrmann classification	XW Liang/2023	307	RECIST	I+II	52	1.29	0.90-1.86	0.163
Lauren classification	F Bataille/2003	25	TRG	Intestinal-type	4	1.70	0.48-6.05	0.415
Lauren classification	K Becker/2011	480	TRG	Intestinal-type	113	1.33	1.09-1.63	0.006
Lauren classification	T Xie/2021	33	TRG	Intestinal-type	5	0.71	0.24-2.16	0.551
Lauren classification	YL Tong/2021	141	TRG	Intestinal-type	42	1.27	0.91-1.79	0.16
Lauren classification	GT Lin/2022	81	TRG	Intestinal-type	46	1.23	0.97-1.55	0.083
Lauren classification	X Xu/2019	120	TRG	Intestinal-type	56	1.40	0.99-1.97	0.053
Lauren classification	YJ Zhu/2019	65	TRG	Intestinal-type	13	0.89	0.47.1.69	0.731
Lauren classification	F Bataille/2003	25	TRG	Diffuse-type	7	0.81	0.48-1.37	0.43
Lauren classification	K Becker/2011	480	TRG	Diffuse-type	56	0.99	0.73-1.35	0.964
Lauren classification	T Xie/2021	33	TRG	Diffuse-type	6	0.49	0.21-1.12	0.091
Lauren classification	YL Tong/2021	141	TRG	Diffuse-type	33	0.78	0.56-1.09	0.154
Lauren classification	YJ Zhu/2019	65	TRG	Diffuse-type	11	0.76	0.38-1.49	0.419
Lauren classification	K Becker/2011	480	TRG	Mixed-type	54	0.66	0.50-0.88	0.004
Lauren classification	T Xie/2021	33	TRG	Mixed-type	9	5.14	0.74-35.80	0.098
Lauren classification	YJ Zhu/2019	65	TRG	Mixed-type	10	1.26	0.52-3.06	0.607
Grade	JY Zhang/2022	633	TRG	well-differentiated	12	1.11	0.46-2.67	0.819
Grade	YJ Zhu/2019	65	TRG	well-differentiated	2	3.82	0.19-76.46	0.381
Grade	QW Li/2022	184	TRG	well-differentiated	26	1.95	1.23-3.06	0.004
Grade	JY Zhang/2022	633	TRG	moderately-differentiated	94	1.26	0.94-1.69	0.118
Grade	YJ Zhu/2019	65	TRG	moderately-differentiated	11	1.66	0.65-4.25	0.286
Grade	QW Li/2022	184	TRG	moderately-differentiated	26	2.32	1.42-3.78	0.001
Grade	ZC Chen/2022	93	RECIST	moderately-differentiated	14	1.01	0.53-1.91	0.976
Grade	T Xie/2021	33	TRG	poorly-differentiated	5	1.43	0.33-6.27	0.636
Grade	JY Zhang/2022	633	TRG	poorly-differentiated	258	0.93	0.84-1.02	0.104
Grade	YJ Zhu/2019	65	TRG	poorly-differentiated	24	0.79	0.59-1.06	0.115
Grade	YZ Wu/2021	93	TRG	poorly-differentiated	32	0.96	0.76-1.23	0.76
Grade	QW Li/2022	184	TRG	poorly-differentiated	12	0.30	0.18-0.52	<0.001
Grade	ZC Chen/2022	93	RECIST	poorly-differentiated	25	1.07	0.71-1.59	0.759
Grade	T Xie/2021	33	TRG	undifferentiated	0	0.20	0.01-4.49	0.308
Grade	X Wu/2021	267	RECIST	undifferentiated	95	1.31	1.02-1.68	0.033
Grade	ZC Chen/2022	93	RECIST	undifferentiated	14	1.01	0.53-1.91	0.976
Grade	K Becker/2011	480	TRG	well＆moderately-differentiated	46	1.26	0.87.1.84	0.227
Grade	L Jiang/2021	203	TRG	well＆moderately-differentiated	46	1.87	1.14-3.07	0.013
Grade	T Xie/2021	33	TRG	well＆moderately-differentiated	0	0.20	0.01.4.49	0.308
Grade	YL Tong/2021	141	TRG	well＆moderately-differentiated	26	2.29	1.19-4.38	0.013
Grade	JY Zhang/2022	633	TRG	well＆moderately-differentiated	106	1.24	0.95-1.63	0.112
Grade	X Xu/2019	120	TRG	well＆moderately-differentiated	38	1.58	0.94.2.68	0.087
Grade	YJ Zhu/2019	65	TRG	well＆moderately-differentiated	13	1.97	0.79-4.87	0.144
Grade	YZ Wu/2021	93	TRG	well＆moderately-differentiated	12	1.11	0.56-2.22	0.759
Grade	T Du/2021	63	TRG	well＆moderately-differentiated	30	1.85	0.99.3.45	0.053
Grade	QW Li/2022	184	TRG	well＆moderately-differentiated	52	2.12	1.64.2.74	<0.001
Grade	X Wu/2021	267	RECIST	well＆moderately-differentiated	95	1.31	1.02-1.68	0.033
Grade	XW Liang/2023	307	RECIST	well＆moderately-differentiated	87	2.88	1.99-4.17	<0.001
Grade	J Wang/2020	90	RECIST	well＆moderately-differentiated	44	1.79	1.07-2.99	0.027
Grade	ZC Chen/2022	93	RECIST	well＆moderately-differentiated	14	1.01	0.53-1.91	0.976
Clinical tumor stage	L Jiang/2021	203	TRG	T2	16	2.08	0.79-5.46	0.136
Clinical tumor stage	T Xie/2021	28	TRG	T2	6	4.50	0.62.32.60	0.137
Clinical tumor stage	JY Zhang/2022	633	TRG	T2	12	1.48	0.56-3.89	0.429
Clinical tumor stage	J Li/2022	141	TRG	T2	9	1.71	0.73-4.04	0.22
Clinical tumor stage	L Jiang/2021	203	TRG	T2-T3	63	1.32	0.96-1.83	0.093
Clinical tumor stage	T Xie/2021	28	TRG	T2-T3	11	2.75	0.98-7.74	0.055
Clinical tumor stage	YL Tong/2021	141	TRG	T2-T3	6	1.32	0.39-4.48	0.656
Clinical tumor stage	JY Zhang/2022	633	TRG	T2-T3	198	2.09	1.67-2.61	<0.001
Clinical tumor stage	J Li/2022	141	TRG	T2-T3	34	1.12	0.86-1.46	0.404
Clinical tumor stage	XH Tang/2022	33	TRG	T2-T3	5	0.86	0.34-2.15	0.743
Clinical tumor stage	QW Li/2022	184	TRG	T2-T3	28	0.95	0.68-1.34	0.788
Clinical tumor stage	XW Liang/2023	307	RECIST	T2-T3	74	3.15	2.05-4.85	<0.001
Clinical tumor stage	L Jiang/2021	203	TRG	T3	47	1.18	0.80-1.73	0.413
Clinical tumor stage	T Xie/2021	33	TRG	T3	5	1.43	0.33-6.27	0.636
Clinical tumor stage	JY Zhang/2022	633	TRG	T3	186	2.15	1.70-2.72	<0.001
Clinical tumor stage	J Li/2022	141	TRG	T3	25	1.00	0.70-1.42	0.978
Clinical tumor stage	XH Tang/2022	33	TRG	T3	5	0.86	0.34-2.15	0.743
Clinical tumor stage	QW Li/2022	184	TRG	T3	28	0.95	0.68-1.34	0.788
Clinical tumor stage	L Jiang/2021	203	TRG	T4	60	0.80	0.62-1.02	0.076
Clinical tumor stage	T Xie/2021	33	TRG	T4	5	0.32	0.14-0.73	0.007
Clinical tumor stage	YL Tong/2021	141	TRG	T4	69	0.98	0.89-1.07	0.652
Clinical tumor stage	JY Zhang/2022	633	TRG	T4	166	0.61	0.54-0.70	<0.001
Clinical tumor stage	J Li/2022	141	TRG	T4	18	0.83	0.53-1.30	0.422
Clinical tumor stage	XH Tang/2022	33	TRG	T4	10	1.09	0.65-1.82	0.74
Clinical tumor stage	QW Li/2022	184	TRG	T4	36	1.04	0.79-1.36	0.785
Clinical tumor stage	XW Liang/2023	307	RECIST	T4	88	0.64	0.54-0.74	<0.001
Clinical nodal stage	L Jiang/2021	203	TRG	N0	38	1.07	0.70-1.66	0.746
Clinical nodal stage	T Xie/2021	28	TRG	N0	12	4.50	1.23-16.45	0.023
Clinical nodal stage	YL Tong/2021	141	TRG	N0	30	1.47	0.91-2.37	0.119
Clinical nodal stage	JY Zhang/2022	633	TRG	N0	58	2.52	1.50-4.23	<0.001
Clinical nodal stage	J Li/2022	141	TRG	N0	15	0.49	0.31-0.78	0.003
Clinical nodal stage	XH Tang/2022	33	TRG	N0	5	6.00	0.78.45.90	0.084
Clinical nodal stage	T Du/2021	63	TRG	N0	9	0.97	0.34.2.77	0.957
Clinical nodal stage	QW Li/2022	184	TRG	N0	11	1.29	0.64-2.61	0.48
Clinical nodal stage	XW Liang/2023	307	RECIST	N0	57	5.10	2.71-9.61	<0.001
Clinical nodal stage	J Wang/2020	90	RECIST	N0	42	2.44	1.26-4.70	0.008
Clinical nodal stage	T Xie/2021	28	TRG	N1	4	1.00	0.27-3.66	1
Clinical nodal stage	JY Zhang/2022	633	TRG	N1	122	1.37	1.06-1.76	0.016
Clinical nodal stage	QW Li/2022	184	TRG	N1	18	1.35	0.80-2.28	0.262
Clinical nodal stage	T Xie/2021	28	TRG	N2	2	0.38	0.08-1.72	0.207
Clinical nodal stage	JY Zhang/2022	633	TRG	N2	115	0.88	0.70-1.09	0.238
Clinical nodal stage	QW Li/2022	184	TRG	N2	21	0.86	0.56.1.30	0.465
Clinical nodal stage	T Xie/2021	28	TRG	N3	3	0.75	0.18-3.09	0.69
Clinical nodal stage	JY Zhang/2022	633	TRG	N3	69	0.57	0.44-0.75	<0.001
Clinical nodal stage	QW Li/2022	184	TRG	N3	14	0.80	0.46-1.37	0.412
Clinical stage	T Xie/2021	33	TRG	II	8	2.29	0.58-9.06	0.24
Clinical stage	XH Tang/2022	33	TRG	II	6	7.20	0.97-53.36	0.053
Clinical stage	T Du/2021	63	TRG	II	21	3.02	1.02-8.93	0.045
Clinical stage	T Xie/2021	33	TRG	III	5	0.32	0.14-0.73	0.007
Clinical stage	XH Tang/2022	33	TRG	III	9	0.64	0.41-0.97	0.038
Clinical stage	T Du/2021	63	TRG	III	23	0.62	0.44-0.87	0.006
Clinical stage	J Wang/2020	90	RECIST	I+II	46	1.70	1.06-2.73	0.029
Clinical stage	JM Qin/2022	100	RECIST	I+II	20	1.20	0.79-1.84	0.391
NCT regimen	T Xie/2021	33	TRG	SOX	13	1.24	0.64-2.39	0.525
NCT regimen	YL Tong/2021	141	TRG	SOX	64	1.17	0.98-1.40	0.073
NCT regimen	T Xie/2021	33	TRG	XELOX	4	1.14	0.24-5.34	0.865
NCT regimen	YL Tong/2021	141	TRG	XELOX	4	3.52	0.40-30.71	0.255
NCT regimen	YL Tong/2021	141	TRG	FOLFOX	7	3.52	0.16-0.82	0.015
NCT regimen	HB Ye/2014	86	RECIST	FOLFOX	25	0.83	0.54-1.28	0.394
NCT cycles	L Jiang/2021	203	TRG	2	23	0.93	0.53-1.66	0.818
NCT cycles	YL Tong/2021	141	TRG	2	44	0.94	0.72-1.23	0.675
NCT cycles	YH Chen/2021	140	TRG	2	60	0.89	0.56-1.39	0.596
NCT cycles	L Jiang/2021	203	TRG	3	32	0.83	0.54-1.29	0.415
NCT cycles	YL Tong/2021	141	TRG	3	13	1.43	0.63-3.23	0.39
NCT cycles	YH Chen/2021	140	TRG	3	62	1.14	0.66-1.97	0.63
NCT cycles	L Jiang/2021	203	TRG	4	68	1.13	0.86-1.49	0.37
NCT cycles	YL Tong/2021	141	TRG	4	18	0.93	0.52-1.65	0.809
HER-2	JJ Qu/2013	53	RECIST	+	10	4.46	1.08-18.45	0.039
HER-2	HB Cui/2014	104	RECIST	+	12	3.89	0.95-15.88	0.058
EGFR	JJ Qu/2013	53	RECIST	+	17	1.17	0.72-1.89	0.527
EGFR	HB Cui/2014	104	RECIST	+	32	1.06	0.74-1.50	0.764
Ki67	JJ Qu/2013	53	RECIST	≥10%	20	4.46	1.08-18.45	0.273
Ki67	HB Cui/2014	104	RECIST	≥10%	38	3.89	0.95-15.88	0.014
P53	F Bataille/2003	25	TRG	≥10%	9	2.29	1.08-4.88	0.032
P53	JJ Qu/2013	53	RECIST	≥10%	10	0.50	0.29-0.86	0.013
P53	HB Cui/2014	104	RECIST	≥10%	19	1.42	0.28-0.63	<0.001
TOPO II	YQ Song/2009	35	RECIST	+	6	1.14	0.48-2.70	0.761
TOPO II	JJ Qu/2013	53	RECIST	+	16	1.02	0.64-1.64	0.933
TOPO II	YL Tong/2021	141	TRG	+	17	0.68	0.40-1.17	0.161
Perineural invasion	YJ Zhu/2019	65	TRG	+	20	0.95	0.61-1.46	0.803
Note: NCT,Neoadjuvant Chemotherapy; RR, Risk Ratio; CI, Confidence Interval; CEA, carcinoembryonic antigen; CA199,carbohydrate antigen 199; SOX,S-1 and oxaliplatin; XELOX, capecitabine and oxaliplatin regimen; FOLFOX,folinic acid,5-fluorouracil and oxaliplatin; EGFR,epidermal growth factor receptor; HER-2,human epidermal growth factor receptor 2; P53,tumour protein 53; TOPO II,Topoisomerase II.
