# Supplementary material for: Development and Validation of a General Clinical Model for Predicting Neoadjuvant Chemotherapy Efficacy in Locally Advanced Gastric Cancer: Evidence from Meta-Analysis and Real-World Study
Source: Research Square preprint supplement (doi:10.21203/rs.3.rs-6136117/v1), 2025-03-11
Supplement: Supplementary file 6 [file 92bb9bf03c6ff3d6bed6f146.docx]

**Development and Validation of a General Clinical Features Model for Predicting Neoadjuvant Chemotherapy Efficacy in Localized Advanced Gastric Cancer:evidence from Meta-Analysis and Real-World cohort**

Lu Wang1,2,3,4#,Xiaohu Sun1,2,3,5#,Siru Nie1,2,3#,Yingying Wang1,2,3,Rui Guo1,2,3,Shuwen Zheng1,2,3, Xunan Qiu 1,2,3,Tingting Tao1,2,3,Jingjing Jing1,2,3*,Yanke Li1,2,3*,Yuehua Gong1,2,3*

1Tumor Etiology and Screening Department of Cancer Institute and General Surgery, the First Hospital of China Medical University, Shenyang 110001, China

2Key Laboratory of Cancer Etiology and Prevention in Liaoning Education Department, the First Hospital of China Medical University, Shenyang 110001, China

3Key Laboratory of GI Cancer Etiology and Prevention in Liaoning Province, the First Hospital of China Medical University, Shenyang 110001, China

4Department of General Internal Medicine (VIP Ward), Cancer Hospital of Dalian University of Technology, Liaoning Cancer Hospital & Institute, Shenyang 110042, China

5Department of Radiotherapy, Cancer Hospital of China Medical University,

Cancer Hospital of Dalian University of Technology, Liaoning Cancer Hospital & Institute, Shenyang 110042, China

***Corresponding authors:**

Yuehua Gong, [yhgong@cmu.edu.cn](mailto:yhgong@cmu.edu.cn)

Yanke Li, liyanke1437@163.com

Jingjing Jing, jjjing@cmu.edu.cn

**#，Equal contributor.**

**Supplemental Materials and Methods**

The systematic review adhered to the guidelines outlined in the Preferred Reporting Items for Systematic Reviews and meta-analyses (PRISMA) statement(1) and the Meta-Analyses of Observational Studies in Epidemiology (MOOSE) statement(2). Literature screening, quality assessment, data extraction, and statistical analysis were independently conducted by 2 researchers (WL and S-XH). Any disagreements between the 2 authors were resolved through discussion. If a consensus could not be reached, a senior investigator (YH.G.) was consulted to facilitate resolution.

**Inclusion Criteria**

*Study Type*

1. **Research on** identifying clinical factors associated with the NCT efficacy in LAGC, reporting the RR along with the corresponding 95% CI.
2. **Cohort studies** including both prospective and retrospective ones.

*Outcome*

The efficacy of NCT for LAGC was assessed following the completion of treatment.

**Search Strategy**

Studies were identified through a comprehensive search of electronic databases, including English databases and Chinese databases. There are no restrictions regarding the language of publication. To validate potentially relevant studies, we manually reviewed the references of the retrieved articles. We obtained full text copies of potentially relevant articles and the reference lists were searched for further relevant publications.

**Ethical Statement**

The Medical Ethics Committees of Liaoning Cancer Hospital and the First Hospital of China Medical University waived the requirement for informed consent, as this study aims to retrospectively collect data from articles published in peer-reviewed journals.

**Data Extraction and Quality Assessment**
Extract the following information: details of the research design, the region and year of the research, statistical characteristics of the patient population (age and gender), total number of patients, number of patients in each group, research results, identification of risk factors, their RR Scores, and corresponding 95% CIs(3).

****Publication Bias and Sensitivity analyses****

For features encompassing more than 9 studies, publication bias was examined through funnel plot visualization accompanied by Egger's linear regression test. Either observed funnel plot asymmetry or an Egger's test *P*-value below 0.05 implied possible publication bias(4). All statistical analyses were implemented using StataSE (version 15.1). Sensitivity analyses were performed for characteristics involving 3 or more studies, while those demonstrating clinical heterogeneity were described narratively(5).

**Result**

**Literature Search**

Through a comprehensive literature search across 7 databases, we initially identified 2,323 articles, distributed as follows: 121 from PubMed, 216 from Embase, 41 from the Cochrane Library, 660 from Web of Science, 192 from CNKI, 33 from VIP, and 512 from Wanfang. After merging records and removing duplicates, 1,407 unique articles remained. A preliminary screening excluded 1,210 articles based on title and abstract relevance. Subsequently, 155 full-text articles underwent rigorous evaluation.

During full-text assessment, 45 articles were excluded for failing to report outcomes of interest, 9 were excluded due to unavailability of full texts, and an additional 9 were eliminated for inadequate data accessibility, publication in non-peer-reviewed/low-quality journals, or classification as graduate theses. Following these exclusions, 25 studies met the predefined eligibility criteria and were retained for final data synthesis(6-30). This systematic process ensured methodological rigor and minimized selection bias in the evidence integration phase.

**The Characteristics and Quality of Incorporated Literatures**

2 prospective and 23 retrospective cohort studies were included. There were 4,014 cases of gastric cancer documented in the studies, and NCT was found to be effective in 2,190 cases, yielding a response rate of 55%. The studies originate from Europe (including Germany), Asia (including China), and the Americas (including the United States). The age of research participants ranges from 20 to 89 years. Notably, 80% of participants are from Asia, while the remaining 20% are from Europe and the Americas. According to the Newcastle-Ottawa Scale(31), the quality scores of all included studies exceeded 8 points, indicating a high quality of evidence (Table S3).

**Pooled and Subgroup Analyses of Clinical Features Associated with NCT Efficacy**

First, we performed pooled analyses of the relationship between 20 clinical features and NCT efficacy (TRG and RECIST combined) without distinguishing efficacy evaluation criteria, where responsive and non-responsive populations in TRG grading and RECIST grouping were classified according to the criteria described in the "Assessment of NCT treatment response" section. When a study reported both TRG and RECIST as evaluation standards, we prioritized TRG as the outcome. Additionally, if a clinical characteristic was evaluated using either TRG or RECIST as the efficacy criterion in at least 2 studies, we conducted TRG subgroup analyses and RECIST subgroup analyses.

The analysis revealed that 11 features were not associated with NCT efficacy, while 9 out of the 20 evaluated features demonstrated significant correlations with NCT efficacy in patients with LAGC (Figures S2-S10). The pooled and subgroup analyses of these features are summarized as follows:

(1) In the pooled analysis, CEA-negative patients exhibited superior NCT efficacy compared to CEA-elevated patients (RR = 1.10, 95% CI: 1.01*-*1.21, *P* = 0.031, *I²* = 0%).

(2) In the pooled analysis and subgroup analysis of the relationship between tumor location and the efficacy of NCT, when the tumor was located in the upper part, no significant association with NCT efficacy was observed in either the pooled analysis or the TRG subgroup (pooled analysis: RR = 0.94, 95%CI:0.67-1.32, *P* = 0.717, I2 = 86.8%; TRG subgroup: RR = 0.86, 95% CI: 0.60*-*1.24, *P* = 0.418, *I²* = 88.3%). However, the RECIST subgroup analysis demonstrated a correlation with improved NCT efficacy (RR = 1.77, 95% CI: 1.28*-*2.45, *P* = 0.001, *I²* = 0%). However, when the tumor was located in the lower part, both the pooled analysis and TRG subgroup (pooled analysis: RR = 0.87, 95% CI: 0.77*-*0.98, *P* = 0.022, *I²* = 20.4%; TRG subgroup: RR = 0.86, 95% CI: 0.75*-*0.98, *P* = 0.024, *I²* = 32%) indicated inferior NCT efficacy, while no significant association was observed in the RECIST subgroup (RR = 0.91, 95% CI: 0.71*-*1.17, *P* = 0.452, *I²* = 0%).When the tumor is located in the middle part or involves the whole stomach, it has no relation to the efficacy of NCT.

(3) In the pooled analysis of the relationship between Lauren classification and the efficacy of NCT, patients with intestinal-type LAGC had better efficacy of NCT (RR = 1.28, 95% CI: 1.12*-*1.46, *P* < 0.001, *I²* = 0%). Patients with diffuse-type LAGC were also associated with better efficacy of NCT (RR = 1.16, 95% CI: 1.00-1.34, *P* = 0.044, *I²* = 0%). However, there was no significant association between patients with mixed-type LAGC and the efficacy of NCT (RR = 1.16, 95% CI: 1.00-1.34, *P* = 0.044, *I²* = 0%).

(4) In the pooled and subgroup analyses of the relationship between tumor grade and the NCT, patients with well-differentiated LAGC showed an association with better NCT efficacy in the pooled analysis (RR = 1.70, 95% CI: 1.14*-*2.56, *P* = 0.01, *I²* = 0%). Patients with moderately-differentiated LAGC demonstrated better NCT efficacy both in the pooled analysis and the TRG subgroup analysis (pooled analysis: RR = 1.41, 95% CI: 1.13-1.77, *P* = 0.003, *I²* = 47.6%; TRG subgroup: RR = 1.64, 95% CI: 1.05-2.54, *P* = 0.028, *I²* = 55.1%). Tumors with high-to-moderate differentiation also showed better NCT efficacy in both the pooled analysis and the TRG subgroup (pooled analysis: RR = 1.63, 95% CI: 1.35-1.95, *P* < 0.001, *I²* = 54.8%; TRG subgroup: RR = 1.54, 95% CI: 1.33-1.77, *P* < 0.001, *I²* = 38.7%). For patients with poorly differentiated and undifferentiated LAGC, there was no association with the efficacy of NCT, neither in the pooled analysis nor in the subgroup analysis.

(5) In the pooled and subgroup analyses of the relationship between clinical tumor stage and the efficacy of NCT:

T stage: both T2 and T3 LAGC were associated with better NCT efficacy (T2: RR = 1.90, 95% CI: 1.31 - 3.17, *P* = 0.015, *I²* = 0%; T3: RR = 1.52, 95% CI: 1.08 - 2.14, *P* = 0.016, *I²* = 81%). Patients with T4 stage were associated with a poorer NCT treatment response (RR = 0.78, 95% CI: 0.62 - 0.98, *P* = 0.035, *I²* = 89.3%). Further TRG subgroup analysis of T4 patients did not show a significant association with efficacy (RR = 0.82, 95% CI: 0.65 - 1.03, *P* = 0.094, *I²* = 84.1%).

N stage: both N0 and N1 stages were associated with better NCT efficacy(N0: RR = 1.75, 95% CI: 1.06 - 2.89, *P* = 0.028, *I²* = 82.6%;N1: RR = 1.35, 95% CI: 1.28 - 1.69, *P* = 0.009, *I²* = 76.8%). However, in TRG subgroup analysis for N0 stage, there was no demonstrated correlation with the efficacy of NCT (RR = 1.40, 95% CI: 0.86 - 2.29, *P* = 0.181, *I²* = 82.6%). The N2 stage had no relation to the efficacy of NCT (RR = 0.86, 95% CI: 0.71 - 1.04, *P* = 0.114, *I²* = 0%). The N3 stage was significantly associated with poorer NCT efficacy (RR = 0.62, 95% CI: 0.49 - 0.78, *P* < 0.001, *I²* = 0%).

Clinical stage: patients with stage I/II LAGC were associated with better NCT efficacy ( RR = 1.42, 95% CI: 1.04-1.94, *P* = 0.029, *I²* = 12.3%), and stage II was also significantly associated with a better NCT treatment response (RR = 3.27, 95% CI: 1.51-7.09, *P* = 0.003, *I²* = 0%). However, Stage III was associated with poorer NCT efficacy (RR = 0.55, 95% CI: 0.43-0.72, *P* < 0.001, *I²* = 20.8%). In the analysis of clinical stage, in order to cover all clinical stages, the pooled analysis of stage I/II was selected to be included in the model, instead of including stage II alone in the prediction model.

(6) In the pooled analysis, HER-2 3+ (IHC score) was significantly associated with better NCT efficacy (RR = 4.16, 95% CI: 1.53-11.29, *P* = 0.005, *I²* = 0%).

(7) In the pooled analysis, a Ki67 ≥10% indicated poorer efficacy of neoadjuvant chemotherapy (NCT) (relative risk [RR] = 0.79, 95% confidence interval [CI]: 0.67-0.94, *P* = 0.008, *I²* = 0.008%).

**Publication Bias and Sensitivity Analyses**

Publication bias was assessed for tumor location and tumor grade, both of which included more than 9 studies. Asymmetry was observed in the funnel plot for tumor location, and the results of Egger's test across its 4 subgroups (*P* = 0.394, *P* = 0.040, *P* = 0.682, and *P* = 0.147, respectively) suggested potential publication bias in the gastric body vs. non-gastric body subgroup. For tumor grade, minor funnel plot asymmetry was noted, but Egger's test results (*P* = 0.818 and *P* = 0.660) confirmed the absence of publication bias (Figure S11-S12). Sensitivity analyses verified the robustness of the findings, demonstrating high consistency in results across different analytical scenarios (Figure S13-17).

**Supplementary Data**

**References**

1. Shamseer L, Moher D, Clarke M, Ghersi D, Liberati A, Petticrew M, et al. Preferred reporting items for systematic review and meta-analysis protocols (PRISMA-P) 2015: elaboration and explanation. BMJ. 2015;350:g7647.

2. Stroup DF, Berlin JA, Morton SC, Olkin I, Williamson GD, Rennie D, et al. Meta-analysis of observational studies in epidemiology: a proposal for reporting. Meta-analysis Of Observational Studies in Epidemiology (MOOSE) group. Jama. 2000;283(15):2008-12.

3. Esterman AJ. 1. Epidemiology, study design and data analysis (2nd edn). Mark Woodward, Chapman & Hall/CRC, Boca Raton, 2005. No. of pages: xxii + 849. Price: $79.95. ISBN: 1‐58488‐415‐0. Statistics in medicine. 2006;25:1439-40.

4. Higgins JP, Thompson SG. Quantifying heterogeneity in a meta-analysis. Statistics in medicine. 2002;21(11):1539-58.

5. J DJ, PT HJ, G AD. Analysing Data and Undertaking Meta‐Analyses: Wiley; 2008.

6. Bataille F, Rümmele P, Dietmaier W, Gaag D, Klebl F, Reichle A, et al. Alterations in p53 predict response to preoperative high dose chemotherapy in patients with gastric cancer. Molecular pathology : MP. 2003;56(5):286-92.

7. Becker K, Langer R, Reim D, Novotny A, Meyer zum Buschenfelde C, Engel J, et al. Significance of histopathological tumor regression after neoadjuvant chemotherapy in gastric adenocarcinomas: a summary of 480 cases. Annals of surgery. 2011;253(5):934-9.

8. Jiang L, Ma Z, Ye X, Kang W, Yu J. Clinicopathological factors affecting the effect of neoadjuvant chemotherapy in patients with gastric cancer. World journal of surgical oncology. 2021;19(1):44.

9. Xie T, Peng Z, Liu Y, Zhang Z, Zhang X, Li J, et al. Clinicopathological Characteristics and Response to Chemotherapy in Treatment-Naive Epstein-Barr Virus Associated Gastric Cancer: A Retrospective Study. Frontiers in oncology. 2021;11:611676.

10. Xu W, Fan Z, Wang L, He C, Ni Z, Hua Z, et al. Prediction model of objective response after neoadjuvant chemotherapy in patients with locally advanced gastric cancer. American journal of translational research. 2021;13(3):1568-79.

11. Tong Y, Zhu Y, Zhao Y, Jiang C, Wang W, Shan Z, et al. CA724 Predicts Tumor Regression Grade in Locally Advanced Gastric Cancer Patients with Neoadjuvant Chemotherapy. Journal of Cancer. 2021;12(21):6465-72.

12. Chen Y, He J, Liu D, Xiao J, Chen X, Tang H, et al. Triplet versus doublet neoadjuvant chemotherapy regimens for locally advanced gastric cancer: a propensity score matching analysis. BMC cancer. 2021;21(1):1328.

13. Lin GT, Huang JB, Lin JL, Lin JX, Xie JW, Wang JB, et al. Body composition parameters for predicting the efficacy of neoadjuvant chemotherapy with immunotherapy for gastric cancer. Frontiers in immunology. 2022;13:1061044.

14. Zhang J, Cui Y, Wei K, Li Z, Li D, Song R, et al. Deep learning predicts resistance to neoadjuvant chemotherapy for locally advanced gastric cancer: a multicenter study. Gastric cancer : official journal of the International Gastric Cancer Association and the Japanese Gastric Cancer Association. 2022;25(6):1050-9.

15. Li J, Yin H, Wang Y, Zhang H, Ma F, Li H, et al. Multiparametric MRI-based radiomics nomogram for early prediction of pathological response to neoadjuvant chemotherapy in locally advanced gastric cancer. European radiology. 2023;33(4):2746-56.

16. Kang WZ, Wang BZ, Li DF, Jiang ZC, Xiong JP, Li Y, et al. Can Gastric Cancer Patients with High Mandard Score Benefit from Neoadjuvant Chemotherapy? Canadian journal of gastroenterology & hepatology. 2022;2022:8178184.

17. Tang X, Wu X, Guo T, Jia F, Hu Y, Xing X, et al. Focal Adhesion-Related Signatures Predict the Treatment Efficacy of Chemotherapy and Prognosis in Patients with Gastric Cancer. Frontiers in oncology. 2022;12:808817.

18. Liang XW, Xiao WS, Lei H, Huag QC, Dong YL, Wang F, et al. Risk model and factors for prediction of response to neoadjuvant chemotherapy in patients with advanced gastric cancer-a two-center cohort study. BMC cancer. 2023;23(1):41.

19. Yan-qiang S, Yang L, Hui-zhong L, Xin-jian P, Lin-hao L. Changes of MDR gene expression in patietns of gastric cancer undergoing neoadjuvant chemotherapy CHINESE JOURNAL OF GENERAL SURGERY 2009;24(5):365-7.

20. Jian-jun Q, Yi-ran S, Feng-yun H. Clinical study of the predictors to neoadjuvant chemotherapy in patients with advanced gastric cancer. Chinese Journal of Gastrointestinal Surgery. 2013;16(3):276-80.

21. Haibo Y, Weijian S, Mingdong L, Shuai L, Ke C, Jingwei H, et al. Modified FOLFOX4 vs docetaxel-oxaliplatin program neoadjuvant chemotherapy in postoperative stage Ⅲ gastric cancer. Chinese Journal of General Surgery. 2014;29(6):429-32.

22. Haibin C, Huai'e G, Xiyong B, Wei Z, Yuanyuan Z. Application of the predictors EGFR, HER2, Ki-67 and P53 on neoadjuvant chemotherapy in patients with advanced gastric cancer. China Medical Herald. 2014;11(2):35-8.

23. Xing X, Zhichao Z, Tao Z, Yan Z, Guoliang Z, Jingkang Y. Clinicopathological correlation of tumor regression grade in advanced gastric cancer after neoadjuvant chemotherapy. Journal of Practical Oncology. 2019;34(4):316-20.

24. Yongjian Z, Ying L, Jun J, Wen Z, Liyan X, Aiping Z, et al. Predictive value of quantitative dynamic contrast?enhanced magnetic resonance imaging for the efficacy of neoadjuvant chemotherapy in locally advanced gastric cancer. Chinese Journal of Oncology. 2019;41(10):765-70.

25. Wang J, Xiaoyan X, Yanyan S, Zhen H, Hui L. Relationship between MicroRNA-150 expression level and the effect of preoperative neoadjuvant chemotherapy in patients with gastric cancer. Journal of Clinical Internal Medicine. 2020;37(5):360-2.

26. Yanzhang W, Zhixiong W, Guanghua L, Zhihao Z, Zhao W. The clinical value of inflammatory markers in predicting the chemosensitivity for gastric cancer patients with neoadjuvant chemotherapy. Journal of Digestive Oncology(Electronic Version). 2021;13(2):87-92.

27. Tao D, Shun Z, Xi-mao C, Xiao-hua J, Jun-yi H. Clinical value of LncRNA WT1-AS in predicting the efficacy of neoadjuvant chemotherapy for gastric cancer. Journal of Tongji University(Medical Science). 2021;42(5):612-5.

28. Qingwan L, Zhiping Z, Depei G, Dafu Z, Kun X, Yanfen C, et al. A multicenter study of computed tomography-based radiomics signature prediction of neoadjuvant chemotherapy out-comes for locally advanced gastric cancer. Journal of Medical Imaging. 2022;32(4):619-25.

29. Jiamin Q, Guangguo L, Hong W. The Application of MSCT in Staging Diagnosis and Chemotherapy Efficacy Prediction of Gastric Cancer. Imaging Science and Photochemistry. 2022;40(3):651-4.

30. Zhicheng C, Kexin Z, Jinli Z, Yi L. Value of CT radiomics in predicting the initial efficacy of neoadjuvant chemotherapy for advanced gastric cancer with peritoneal metastasis. Journal of Practical Radiology. 2022;38(3):420-3,36.

31. Wells GA, Wells G, Shea B, Shea B, O'Connell D, Peterson J, et al., editors. The Newcastle-Ottawa Scale (NOS) for Assessing the Quality of Nonrandomised Studies in Meta-Analyses2014.
