# Supplementary material for: Development and Validation of a General Clinical Model for Predicting Neoadjuvant Chemotherapy Efficacy in Locally Advanced Gastric Cancer: Evidence from Meta-Analysis and Real-World Study
Source: Research Square preprint supplement (doi:10.21203/rs.3.rs-6136117/v1), 2025-03-11
Supplement: Supplementary file 7 [file b7f8832a2f7ad24b89bfd9f5.xlsx]

## Sheet: Table S6-1
Supplemental Table 6-1 Baseline Characteristics of Patients in Validation Cohorts
Variables		validation cohort 1				validation cohort 2				validation cohort 3
		Response(N=496)	No response(N=257)	P value		Response(N=65)	No response(N=35)	P value		Response(N=33)	No response(N=94)	P value
Clinical features	Female (%)	144(29.0)	59(23.0)	0.0749		18(27.7)	4(11.4)	0.0611		8(24.2)	27(28.7)	0.6201
	Age (years)	59.15±9.07	58.86±8.54	0.671		57±12.93	59.11±12.53	0.432		61.48±9.20	61.95±8.56	0.79
Tumor markers	CEA≤5(ng/ml)	220(44.4)	40(15.6)	<0.001		35(53.9)	7(20.0)	0.0011		22(66.7)	67(71.3)	0.6188
Location				<0.0001				0.0895				0.5073
	Upper	126(25.4)	41(16.0)			17(26.2)	2(5.7)			2(6.1)	12(12.8)
	Middle	148(29.8)	86(33.5)			21(32.3)	15(42.9)			17(51.5)	43(45.7)
	Lower	209(42.1)	107(41.6)			24(60.4)	15(42.9)			14(42.4)	36(38.3)
	Whole	13(2.6)	23(8.9)			3(9.2)	3(8.6)			0(0)	3(3.2)
Borrmann classification	Borrmann type I+II	119(24.0)	67(26.1)	0.5307		16(24.6)	10(28.6)	0.6671		9(27.3)	25(26.6)	0.9398
Lauren classification				<0.0001				0.7647				0.0006
	Intestinal-type	212(42.7)	81(31.5)			22(33.8)	10(28.6)			11(33.3)	12(12.8)
	Diffuse-type	201(40.5)	117(45.5)			30(46.2)	16(45.7)			21(63.6)	51(22.3)
	Mixed-type	83(16.7)	59(23.0)			13(20.0)	9(25.7)			1(3.0)	31(23.0)
Grade				<0.0001				0.0069				<0.0001
	Well-differentiated	118(23.8)	6(2.3)			24(36.9)	2(5.7)			12(36.4)	2(2.1)
	Moderately-differentiated	101(20.4)	50(19.5)			13(20.0)	9(25.7)			8(24.2)	13(13.8)
	Poorly-differentiated	231(46.6)	161(62.6)			23(35.4)	18(65.7)			11(33.3)	65(69.1)
	Undifferentiated	46(9.3)	40(15.6)			5(7.7)	6(2.9)			2(6.1)	14(14.9)
Clinical Tumor Stage				<0.0001				0.0006				0.0079
	T2	108(21.8)	23(8.9)			13(20.0)	2(5.7)			5(15.5)	8(8.5)
	T3	223(45.0)	73(28.4)			33(50.8)	9(25.7)			5(15.2)	2(2.1)
	T4	165(33.3)	161(62.6)			19(29.2)	24(68.6)			23(69.7)	84(89.4)
Clinical Nodal Stage				<0.0001				0.0069				0.0482
	N0	95(19.2)	22(8.6)			11(31.4)	6(17.1)			10(30.3)	18(19.1)
	N1	148(29.8)	38(14.8)			18(27.7)	2(5.7)			14(42.4)	40(42.6)
	N2	208(41.9)	140(54.5)			29(44.6)	15(42.9)			9(27.3)	19(20.2)
	N3	45(9.1)	57(22.2)			7(10.8)	12(24.3)			0(0)	17(18.1)
Clinical Stage				0.0014				0.0144				0.4204
	I+II	168(33.9)	58(22.6)			29(44.6)	7(20.0)			16(48.5)	38(40.4)
	III	328(66.1)	199(77.4)			36(55.4)	28(80.0)			17(51.5)	56(59.6)
NCT Regimen				0.7284				0.5214				0.9462
	SOX	317(63.9)	162(63)			38(58.5)	22(62.9)			9(27.3)	23(24.5)
	XELOX	47(9.5)	21(8.2)			6(9.2)	5(14.3)			17(51.5)	51(54.3)
	FOLFOX	132(26.6)	74(28.8)			21(32.3)	8(22.9)			7(32.3)	20(21.3)
NCT cycles				0.5161				0.2051				0.5292
	2	255(51.4)	119(46.3)			30(46.2)	16(45.7)			19(46.2)	60(45.7)
	3	57(11.5)	26(10.1)			8(12.3)	5(14.3)			8(12.3)	24(14.3)
	4	130(26.2)	74(28.8)			15(23.1)	18(51.4)			6(18.2)	10(10.6)
Immunohistochemical	HER-2(+++)	120(24.2)	14(5.4)	<0.0001		12(18.5)	4(11.4)	0.3602		9(27.3)	9(9.6)	0.0121
	Ki67(≥10%)	204(41.1)	129(50.2)	0.0176		41(63.1)	17(48.6)	0.161		21(63.6)	80(85.1)	0.0085
	P53(+)	48(9.7)	13(5.1)	0.0276		11(31.4)	7(20.0)	0.7025		10(30.3)	23(24.5)	0.5108
Note:Data are median (IQR), mean ± SD, or n (%).Chemotherapy efficacy evaluation criteria: TRG.
Note: NCT,Neoadjuvant Chemotherapy; CEA, carcinoembryonic antigen; CA199,carbohydrate antigen 199; SOX,S-1 and oxaliplatin; XELOX, capecitabine and oxaliplatin regimen; FOLFOX,folinic acid,5-fluorouracil and oxaliplatin; EGFR,epidermal growth factor receptor; HER-2,human epidermal growth factor receptor 2; P53,tumour protein 53; TOPO II,Topoisomerase II.

## Sheet: Table S6-2
Supplemental Table 6-2 Comparison of Baseline Characteristics Between Validation Cohorts
Variables		validation cohort 1	validation cohort 2	validation cohort 3	P value
		(n=753)	(n=100)	(n=127)
Clinical features	Female (%)	203(27.0)	32(32.0)	35(27.6)	0.5701
	Age (years)	59.05±8.89	58.84±11.66	61.83±8.70	0.0058
Tumor markers	CEA≤5(ng/ml)	260(34.5)	42(42.0)	89(70.1)	<0.0001
Location					0.0075
	Upper	167(22.2)	19(19.0)	14(11.0)
	Middle	234(31.1)	36(36.0)	60(47.2)
	Lower	316(42.0)	39(39.0)	50(39.4)
	Whole	36(4.8)	6(6.0)	3(7.1)
Borrmann classification	Borrmann type I+II	186(24.7)	26(26.0)	34(26.8)	0.8626
Lauren classification					0.0003
	Intestinal-type	293(38.9)	32(32.0)	23(18.1)
	Diffuse-type	318(42.2)	46(46.0)	72(56.7)
	Mixed-type	142(18.9)	22(122.0)	32(25.2)
Grade					0.0502
	Well-differentiated	124(16.5)	26(26.0)	14(11.0)
	Moderately-differentiated	151(20.1)	22(22.0)	21(16.5)
	Poorly-differentiated	392(52.1)	41(46.0)	76(59.8)
	Undifferentiated	86(11.4)	11(6.0)	16(12.6)
Clinical Tumor Stage					<0.0001
	T2	131(17.4)	15(15.0)	13(10.2)
	T3	296(39.3)	42(42.0)	7(5.5)
	T4	326(43.3)	43(43.0)	107(84.3)
Clinical Nodal Stage					<0.0001
	N0	117(15.5)	17(17.0)	28(22.0)
	N1	186(24.7)	20(20.0)	54(42.5)
	N2	348(46.2)	44(44.0)	28(22.0)
	N3	102(13.5)	19(19.0)	17(13.4)
Clinical Stage					0.0143
	I+II	226(30.0)	36(36.0)	54(42.5)
	III	527(70.0)	64(64.0)	73(57.5)
NCT					<0.0001
	SOX	479(63.6)	60(60.0)	32(25.2)
	XELOX	68(9.0)	11(11.0)	68(53.5)
	FOLFOX	206(27.4)	29(29.0)	27(21.3)
NCT cycles					<0.0001
	2	374(49.7)	54(54.0)	79(62.2)
	3	83(11.0)	13(13.0)	32(25.2)
	4	204(27.1)	33(33.0)	16(12.6)
Immunohistochemical	HER-2(+++)	134(17.8)	16(16.0)	18(14.2)	0.5752
	Ki67(≥10%)	333(44.2)	58(58.0)	101(79.5)	<0.0001
	P53(+)	61(8.1)	18(10.0)	33(26.0)	<0.0001
Note:Data are median (IQR), mean ± SD, or n (%).Chemotherapy efficacy evaluation criteria: TRG.
