# Supplementary material for: Development and Validation of a General Clinical Model for Predicting Neoadjuvant Chemotherapy Efficacy in Locally Advanced Gastric Cancer: Evidence from Meta-Analysis and Real-World Study
Source: Research Square preprint supplement (doi:10.21203/rs.3.rs-6136117/v1), 2025-03-11
Supplement: Supplementary file 8 [file cdc269afb9833cde29e37554.xlsx]

## Sheet: Table S1
Supplemental Table 1 Search Strategy for the Systematic Review and Meta-Analysis
Databases		Search strategy
English databases	PubMed	((("Stomach Neoplasms"[Mesh]) OR (((((((((((((((((((Neoplasm, Stomach[Title/Abstract]) OR (Stomach Neoplasms[Title/Abstract])) OR (Stomach Neoplasm[Title/Abstract])) OR (Neoplasms, Stomach[Title/Abstract])) OR (Gastric Neoplasms[Title/Abstract])) OR (Gastric Neoplasm[Title/Abstract])) OR (Neoplasm, Gastric[Title/Abstract])) OR (Neoplasms, Gastric[Title/Abstract])) OR (Cancer of Stomach[Title/Abst…
	Web of Science	#1 TS=(Stomach Neoplasms OR Neoplasm, Stomach OR Stomach Neoplasm OR Neoplasms, Stomach OR Gastric Neoplasms OR Gastric Neoplasm OR Neoplasm, Gastric OR Neoplasms, Gastric OR Cancer of Stomach OR Stomach Cancers OR Gastric Cancer OR Cancer, Gastric OR Cancers, Gastric OR Gastric Cancers OR Stomach Cancer OR Cancer, Stomach OR Cancers, Stomach OR Cancer of the Stomach OR Gastric Cancer, Familial D…
	Embase	#76 #22 AND #56 AND #75 #75 #57 OR #58 OR #59 OR #60 OR #61 OR #62 OR #63 OR #64 OR #65 OR #66 OR #67 OR #68 OR #69 OR #70 OR #71 OR #72 OR #73 OR #74 #74 'gastric cancer, familial diffuse':ab,ti #73 'cancer of the stomach':ab,ti #72 'cancers, stomach':ab,ti #71 'stomach cancer':ab,ti #70 'gastric cancers':ab,ti #69 'cancers, gastric':ab,ti #68 'cancer, gastric':ab,ti #67 'gastric cancer':ab,ti #…
	Cochrane	#1 MeSH descriptor: [Risk Factors] explode all trees #2 (Factor, Risk):ti,ab,kw OR(Risk Factor):ti,ab,kw OR(Social Risk Factors):ti,ab,kw OR(Factor, Social Risk):ti,ab,kw OR(Factors, Social Risk):ti,ab,kw #3 (Risk Factor, Social):ti,ab,kw OR(Risk Factors, Social):ti,ab,kw OR(Social Risk Factor):ti,ab,kw OR(Health Correlates):ti,ab,kw OR(Correlates, Health):ti,ab,kw #4(Population at Risk):ti,ab,kw…
Chinese databases	CNKI	(主题:胃癌) AND ((主题:新辅助化疗) OR (主题:术前化疗) OR (主题:术前诱导化疗) OR (主题:先期化疗)) AND ((主题:因素) OR (主题:预测)) Translation： (topic: gastric cancer) AND ((topic: neoadjuvant chemotherapy) OR (topic: preoperative chemotherapy) OR (topic: preoperative induction chemotherapy) OR (topic: prior chemotherapy) ) AND ((Topic: Factors) OR (Topic: Prediction))
	Wanfang	(((主题=胃癌) AND ((((主题=新辅助化疗) OR 主题=术前化疗) OR 主题=术前诱导化疗) OR 主题=先期化疗)) AND ((主题=疗效) OR 主题=效果)) AND ((主题=因素) OR 题名=预测) Translation： Detailed search strategy in Wanfang (((Topic=gastric cancer) AND ((((Topic=Neoadjuvant Chemotherapy)) OR Topic=Preoperative Chemotherapy ) OR Topic=preoperative induction chemotherapy) OR Topic=prior chemotherapy)) AND ((Topic=Effectiveness) OR Topic=Effectiveness)) AND (…
	VIP	((题名或关键词:新辅助化疗) OR (题名或关键词:术前诱导化疗) OR (题名或关键词:先期化疗) OR (题名或关键词:术前化疗)) AND (题名或关键词:胃癌) AND ((题名或关键词:疗效) OR (题名或关键词:效果)) AND ((题名或关键词:因素) OR (题名或关键词:预测)) Translation： (Title or keywords: neo -assisted chemotherapy) or (title or keywords: preoperative chemotherapy) or (title or keywords: early chemotherapy) or (title or keyword: pre -operation chemotherapy)) and (title name or key Ci: Stomach Cancer…
Note:CNKI,China National Knowledge Infrastructure;Wanfang,Wanfang Data Knowledge Service Platform;VIP,VIP Chinese Scientific Journals Database.
