# Supplementary material for: Development and Validation of a General Clinical Model for Predicting Neoadjuvant Chemotherapy Efficacy in Locally Advanced Gastric Cancer: Evidence from Meta-Analysis and Real-World Study
Source: Research Square preprint supplement (doi:10.21203/rs.3.rs-6136117/v1), 2025-03-11
Supplement: Supplementary file 9 [file e63e3763d0b0a28d58b16689.xlsx]

## Sheet: Table S5
Supplemental Table 5 Baseline Characteristics of 20 Clinical Features Included in Systematic Review and Meta-Analysis
Variables		Average range
Clinical features	Female	18.2%-47.8%
	Age (years)	47.36-60.7
	Smoker	20.5%-52.2%
Tumor markers	CEA(ng/ml)	3.6-358.6
	CA199(u/ml)	19.9-1572.0
Tumor location	Upper	3.0%-58.9%
	Middle	17.0%-32.3%
	Lower	13.5%-57.4%
	Whole	1.0%-16.1%
Borrmann classification	Borrmann Type I+II	7.9%-62.0%
Lauren classification	Intestinal-type	27.3%-84.0%
	Diffuse-type	25.2%-49.6%
	Mixed-type	30.8%-24.6%
Grade	Well-differentiated	3.2%-27.7%
	Moderately-differentiated	23.5%-29.0%
	Poorly-differentiated	21.2%-74.2%
	Undifferentiated	3.0%-53.2%
Clinical tumor stage	T2	2.8%-12.8%
	T3	21.2%-48.2%
	T4	39.0%-92.9%
Clinical nodal stage	N0	11.8%-54.4%
	N1	23.4%-29.7%
	N2	21.4%-36.4%
	N3	21.4%-25.5%
Clinical stage	I+II	21.2%-38.1%
	III	42.4%-78.8%
NCT regimen	SOX	57.6%-79.4%
	XELOX	3.5%-18.2%
	FOLFOX	17.0%-48.8%
NCT cycles	2	19.2%-60.3%
	3	14.9%-28.1%
	4	24.8%-52.7%
Immunohistochemical indicators	HER-2(+++)	13.5%-22.6%
	EGFR(+)	54.8%-55.6%
	Ki67(≥10%)	76.0%-77.4%
	P53(+)	52.8%-56.0%
	TOPO II(+)	37.1%-56.6%
Others	Perineural invasion	27.7%-55.4%
Note: CEA, carcinoembryonic antigen; CA199,carbohydrate antigen 199; NCT,Neoadjuvant Chemotherapy; SOX,S-1 and oxaliplatin; XELOX, capecitabine and oxaliplatin regimen; FOLFOX,folinic acid,5-fluorouracil and oxaliplatin; HER-2,human epidermal growth factor receptor 2; EGFR,epidermal growth factor receptor; P53,tumour protein 53; TOPO II,Topoisomerase II.
