# Supplementary material for: Development and Validation of a General Clinical Model for Predicting Neoadjuvant Chemotherapy Efficacy in Locally Advanced Gastric Cancer: Evidence from Meta-Analysis and Real-World Study
Source: Research Square preprint supplement (doi:10.21203/rs.3.rs-6136117/v1), 2025-03-11
Supplement: Supplementary file 10 [file f1ed99227441a48db891814c.xlsx]

## Sheet: Table S8
Supplemental Table 8 Parameters of the NCT Efficacy Prediction Model in LAGC: Numbers of Studies, Sample Sizes, Pooled Relative Risks (95% CIs), β-Coefficients, and Risk Scores
Risk factor		No.of studies	Sample size	Pooled RR	95%CI	β-coefficient	Scores
CEA	≤5μg/L	4	1021	1.1	1.01-1.21	0.1	1
Tumor location	Lower	10	1843	0.87	0.77-0.98	-0.14	-1.5
	Upper	3	511	1.77	1.28-2.45	0.57	5.5
Lauren classification	Intestinal-type	7	945	1.28	1.12-1.46	0.25	2.5
	Diffuse-type	5	744	1.16	1.00-1.34	0.15	1.5
Grade	Well-differentiated	3	882	1.7	1.14-2.56	0.53	5.5
	Moderately-differentiated	4	975	1.41	1.13-1.77	0.34	3.5
Clinical tumor stage	T2	4	1010	1.9	1.31-3.17	0.64	6.5
	T3	8	1675	1.52	1.08-2.14	0.42	4
	T4	8	1675	0.78	0.62-0.98	-0.25	-2.5
Clinical nodal stage	N0	10	1828	1.75	1.06-2.89	0.56	5.5
	N1	3	850	1.35	1.08-1.69	0.3	3
	N3	3	850	0.62	0.49-0.78	-0.48	-5
Clinical stage	I+II	2	190	1.42	1.04-1.94	0.35	3.5
HER-2	(+++)	2	157	4.16	1.53-11.29	1.43	14.5
Ki67	≥10%	2	157	0.79	0.67-0.94	-0.24	-2.5
Note:NCT,neoadjuvant chemotherapy; LAGC, locally advanced gastric cancer; CEA, carcinoembryonic antigen; RR, relative risk; CI,confidence interval; HER-2, human epidermal growth factor receptor 2; Ki67, proliferation marker.
